# Supplementary material for: Lnc-TMEM132D-AS1 as a potential therapeutic target for acquired resistance to osimertinib in non-small-cell lung cancer
Source: Royal Society of Chemistry journal article supplement (doi:10.1039/d2mo00261b), 2022-12-21
Supplement: d2mo00261b4.pdf [file d2mo00261b4.pdf]

**Figure S1. Lnc-TMEM132D-AS1 overexpression decreases osimertinib sensitivity in osimertinib-sensitive NSCLC cells.** (A, B) Lnc-TMEM132D-AS1 overexpression increased the cell viability and colony formation of osimertinib-sensitive cells after osimertinib treatment. (C, D) Lnc-TMEM132D-AS1 overexpression inhibited the cell apoptosis and G2/M-phase cell cycle arrest in osimertinib-sensitive cells after osimertinib treatment. \*\* $P < 0.01$ , \*\*\* $P < 0.001$ .
