# Supplementary material for: Lnc-TMEM132D-AS1 as a potential therapeutic target for acquired resistance to osimertinib in non-small-cell lung cancer
Source: Royal Society of Chemistry journal article supplement (doi:10.1039/d2mo00261b), 2022-12-21
Supplement: d2mo00261b5.pdf [file d2mo00261b5.pdf]

**Table S1. Clinicopathological factors of NSCLC patients (Osimertinib-sensitive/-resistant)**

| Patient | Osimertinib reactivity | Age (yr) | Gender | Smoking status | Histology      | EGFR mutation | Osimertinib taking time |
|---------|------------------------|----------|--------|----------------|----------------|---------------|-------------------------|
| 1       | Sensitive              | 56       | Female | Never          | Adenocarcinoma | 19 Del        | 1 months                |
| 2       | Sensitive              | 60       | Male   | Current        | Adenocarcinoma | 19 Del        | 2 months                |
| 3       | Sensitive              | 64       | Male   | Current        | Adenocarcinoma | 19 Del        | 1.5 months              |
| 4       | Sensitive              | 48       | Female | Never          | Adenocarcinoma | L858R         | 3 months                |
| 5       | Sensitive              | 59       | Female | Never          | Adenocarcinoma | L858R         | 2 months                |
| 6       | Sensitive              | 73       | Female | Never          | Adenocarcinoma | 19 Del        | 1 months                |
| 7       | Sensitive              | 55       | Male   | Never          | Adenocarcinoma | L858R         | 2.5 months              |
| 8       | Sensitive              | 56       | Female | Never          | Adenocarcinoma | L858R         | 1.5 months              |
| 9       | Sensitive              | 49       | Female | Never          | Adenocarcinoma | 19 Del        | 3 months                |
| 10      | Sensitive              | 52       | Female | Never          | Adenocarcinoma | 19 Del        | 2 months                |
| 11      | Sensitive              | 60       | Male   | Current        | Adenocarcinoma | L858R         | 1 months                |
| 12      | Sensitive              | 76       | Male   | Current        | Adenocarcinoma | L858R         | 1.5 months              |
| 13      | Sensitive              | 57       | Female | Unknown        | Adenocarcinoma | L858R         | 1 months                |
| 14      | Sensitive              | 72       | Female | Never          | Adenocarcinoma | 19 Del        | 2.5 months              |
| 15      | Sensitive              | 49       | Male   | Never          | Adenocarcinoma | L858R         | 1 months                |
| 16      | Resistant              | 64       | Male   | Never          | Adenocarcinoma | 19 Del        | 2 months                |
| 17      | Sensitive              | 52       | Female | Never          | Adenocarcinoma | L858R         | 1 months                |
| 18      | Sensitive              | 68       | Female | Never          | Adenocarcinoma | L858R         | 3 months                |
| 19      | Sensitive              | 74       | Male   | Never          | Adenocarcinoma | 19 Del        | 1 months                |
| 20      | Sensitive              | 69       | Male   | Current        | Adenocarcinoma | 19 Del        | 2 months                |
| 21      | Sensitive              | 75       | Female | Unknown        | Adenocarcinoma | L858R         | 3 months                |
| 22      | Sensitive              | 81       | Female | Never          | Adenocarcinoma | 19 Del        | 1 months                |
| 23      | Resistant              | 68       | Male   | Current        | Adenocarcinoma | L858R         | 2 months                |

---

|    |           |    |        |         |                |        |            |
|----|-----------|----|--------|---------|----------------|--------|------------|
| 24 | Sensitive | 74 | Male   | Current | Adenocarcinoma | 19 Del | 1 months   |
| 25 | Resistant | 72 | Female | Never   | Adenocarcinoma | L858R  | 2.5 months |
| 26 | Resistant | 76 | Female | Never   | Adenocarcinoma | L858R  | 12 months  |
| 27 | Resistant | 69 | Male   | Current | Adenocarcinoma | 19 Del | 7 months   |
| 28 | Resistant | 63 | Female | Never   | Adenocarcinoma | L858R  | 11 months  |
| 29 | Resistant | 65 | Male   | Current | Adenocarcinoma | 19 Del | 22 months  |
| 30 | Resistant | 68 | Female | Never   | Adenocarcinoma | L858R  | 13 months  |
| 31 | Resistant | 48 | Female | Never   | Adenocarcinoma | L858R  | 8 months   |
| 32 | Resistant | 47 | Female | Never   | Adenocarcinoma | 19 Del | 11 months  |
| 33 | Resistant | 56 | Male   | Unknown | Adenocarcinoma | 19 Del | 13 months  |
| 34 | Resistant | 67 | Female | Unknown | Adenocarcinoma | L858R  | 9 months   |
| 35 | Resistant | 59 | Male   | Current | Adenocarcinoma | 19 Del | 18 months  |
| 36 | Resistant | 68 | Male   | Never   | Adenocarcinoma | L858R  | 14 months  |
| 37 | Resistant | 71 | Female | Never   | Adenocarcinoma | 19 Del | 9 months   |
| 38 | Resistant | 86 | Male   | Current | Adenocarcinoma | L858R  | 12 months  |
| 39 | Resistant | 68 | Male   | Current | Adenocarcinoma | L858R  | 8 months   |
| 40 | Resistant | 76 | Female | Never   | Adenocarcinoma | 19 Del | 11 months  |
| 41 | Resistant | 71 | Male   | Never   | Adenocarcinoma | L858R  | 16 months  |
| 42 | Resistant | 67 | Female | Never   | Adenocarcinoma | L858R  | 7 months   |
| 43 | Resistant | 69 | Female | Never   | Adenocarcinoma | L858R  | 14 months  |
| 44 | Resistant | 72 | Male   | Current | Adenocarcinoma | 19 Del | 17 months  |
| 45 | Resistant | 74 | Female | Never   | Adenocarcinoma | L858R  | 10 months  |
| 46 | Resistant | 65 | Female | Never   | Adenocarcinoma | 19 Del | 9 months   |
| 47 | Resistant | 59 | Female | Never   | Adenocarcinoma | L858R  | 20 months  |
| 48 | Resistant | 66 | Male   | Current | Adenocarcinoma | 19 Del | 11 months  |
| 49 | Resistant | 75 | Male   | Current | Adenocarcinoma | 19 Del | 9 months   |

---

---

|    |           |    |        |       |                |       |           |
|----|-----------|----|--------|-------|----------------|-------|-----------|
| 50 | Resistant | 77 | Female | Never | Adenocarcinoma | L858R | 11 months |
|----|-----------|----|--------|-------|----------------|-------|-----------|

---
