# Supplementary material for: Lnc-TMEM132D-AS1 as a potential therapeutic target for acquired resistance to osimertinib in non-small-cell lung cancer
Source: Royal Society of Chemistry journal article supplement (doi:10.1039/d2mo00261b), 2022-12-21
Supplement: d2mo00261b6.pdf [file d2mo00261b6.pdf]

**Table S2. Primers and siRNA sequences used in this study**

| Target           | Sequece (5'-3')                       |
|------------------|---------------------------------------|
| lnc-TMEM132D-AS1 | Forward: CCATGGGGACCTGTCTTCTT         |
|                  | Reverse: TCCATCCCTCCAACTGACTGA        |
| lnc-ZNF213-AS1   | Forward: GAACTGAAGGCCGCTGGTTA         |
|                  | Reverse: ATCTAAGCTTTGGGTGAGATCCAG     |
| lnc-GAS5         | Forward: GGGTATGGAGAGTCGGCTTG         |
|                  | Reverse: GTCCCAACATTTCCAATCCTCAC      |
| lnc-SNHG29       | Forward: AAACCCGAGAGAACTGGTCG         |
|                  | Reverse: TAAACCCTACACCAGAGAGCC        |
| lnc-XLOC_003074  | Forward: TTGCATGGGCTTGATCCACA         |
|                  | Reverse: GCATCTGTGTGTGCCGAGAA         |
| lnc-AC006064.5   | Forward: CTTGGTGGGCGATACAGAGTT        |
|                  | Reverse: TAGGACCCTTGGCCCTGATA         |
| lnc-AC007952.4   | Forward: GCAATGTCGCGAGAAAGGTT         |
|                  | Reverse: GACAATAGGAGGTGCCACACA        |
| U6               | Forward: GGAACGATACAGAGAAGATTAGC      |
|                  | Reverse: TGGAACGCTTCACGAATTTGCG       |
| GAPDH            | Forward: GCACCGTCAAGGCTGAGAAC         |
|                  | Reverse: TGGTGAAGACGCCAGTGA           |
| ENTPD1           | Forward: GGGGGAGCCTCTACACAAGT         |
|                  | Reverse: AGAGTGCCTGATCCTTCCCA         |
| has-miR-766-5p   | Forward: GGCAGGAGGAATTGGTGCT          |
|                  | Reverse: ACTGCAGGGTCCGAGGTATT         |
| lnc-TMEM132D-AS1 | siRNA sequence : GAACTGAACTTTCAAGAT   |
| ENTPD1           | siRNA sequence: AAGTACCTGAGTGAATACTGC |
