# Supplementary material for: Lnc-TMEM132D-AS1 as a potential therapeutic target for acquired resistance to osimertinib in non-small-cell lung cancer
Source: Royal Society of Chemistry journal article supplement (doi:10.1039/d2mo00261b), 2022-12-21
Supplement: d2mo00261b7.pdf [file d2mo00261b7.pdf]

**Table 1. The common differentially expressed lncRNAs within two pairs of osimertinib-sensitive and -resistant NSCLC cell lines.**

| IDs          | Location | Type       | Up/Down | HCC827/OR vs HCC827 |                | H1975/OR vs H1975 |                |
|--------------|----------|------------|---------|---------------------|----------------|-------------------|----------------|
|              |          |            |         | Fold change         | <i>P</i> value | Fold change       | <i>P</i> value |
| AC006213.3   | Chr19    | intergenic | Up      | 38.9144             | 0.006          | 20.3347           | 0.0067         |
| AC107909.1   | Chr8     | intronic   | Up      | 8.5612              | 0.0331         | 48.9881           | 0.0037         |
| MUC20-OT1    | Chr3     | intergenic | Up      | 37.1261             | 0.0118         | 17.557            | 0.0172         |
| LINC01468    | Chr10    | intergenic | Up      | 23.2038             | 0.0211         | 9.243             | 0.0236         |
| TMEM132D-AS1 | Chr12    | intronic   | Up      | 16.8969             | 0.0097         | 13.3207           | 0.0001         |
| ZNF213-AS1   | Chr16    | intergenic | Up      | 24.9494             | 0.0483         | 4.3313            | 0.0086         |
| LINC01002    | Chr19    | intergenic | Up      | 2.4807              | 0.0097         | 26.4895           | 0.0037         |
| CRIM1-DT     | Chr12    | intergenic | Up      | 20.2355             | 0.0146         | 8.3187            | 0.0266         |
| LINC00893    | ChrX     | intronic   | Up      | 20.11               | 0.015          | 2.3101            | 0.0337         |
| XLOC_003074  | Chr12    | genic      | Up      | 13.8608             | 0.0071         | 5.1011            | 0.0105         |
| AL391294.1   | ChrX     | intronic   | Up      | 11.8597             | 0.0223         | 6.8149            | 0.0081         |
| AC090651.1   | Chr15    | intergenic | Up      | 7.7829              | 0.0356         | 9.243             | 0.0236         |
| THRB-IT1     | Chr12    | intronic   | Up      | 9.2815              | 0.019          | 7.3944            | 0.03           |
| AC025171.2   | Chr5     | intergenic | Up      | 7.7829              | 0.0356         | 7.3944            | 0.03           |
| AC087430.1   | Chr3     | intronic   | Up      | 7.0046              | 0.0384         | 6.4701            | 0.0337         |
| AC006064.5   | Chr12    | intronic   | Up      | 6.1831              | 0.0093         | 5.0569            | 0.0084         |
| CARD8-AS1    | Chr19    | exotic     | Up      | 4.5953              | 0.0322         | 5.0823            | 0.0173         |
| AL353622.1   | Chr1     | intergenic | Down    | -2.027              | 0.0058         | -2.7471           | 0.0155         |
| SNHG5        | Chr6     | intergenic | Down    | -2.481              | 0.0541         | -2.7471           | 0.0263         |

---

|             |       |            |      |          |        |          |        |
|-------------|-------|------------|------|----------|--------|----------|--------|
| AC027373.1  | Chr8  | intergenic | Down | -5.1716  | 0.0057 | -2.453   | 0.0441 |
| AL024508.2  | Chr6  | exotic     | Down | -5.4948  | 0.045  | -2.4595  | 0.0364 |
| AL022068.1  | Chr6  | intronic   | Down | -6.4645  | 0.0062 | -4.5452  | 0.0332 |
| SNHG29      | Chr17 | intergenic | Down | -5.7447  | 0.0221 | -7.1244  | 0.0393 |
| ATP2A1-AS1  | Chr16 | exotic     | Down | -5.0484  | 0.0289 | -7.936   | 0.0126 |
| AC103858.2  | Chr15 | intronic   | Down | -9.0502  | 0.0384 | -4.5993  | 0.0378 |
| SNHG6       | Chr8  | exotic     | Down | -4.8361  | 0.0257 | -12.9863 | 0.0277 |
| AL136162.1  | Chr6  | intergenic | Down | -18.1005 | 0.0296 | -2.7828  | 0.0517 |
| GAS5        | Chr1  | intergenic | Down | -12.029  | 0.009  | -8.921   | 0.0001 |
| AC103591.3  | Chr1  | intronic   | Down | -21.848  | 0.0458 | -5.1533  | 0.0194 |
| AC007952.4  | Chr17 | intergenic | Down | -21.2649 | 0.036  | -10.0913 | 0.007  |
| AC051619.7  | Chr15 | exotic     | Down | -29.7365 | 0.0178 | -2.0922  | 0.0055 |
| LRRC75A-AS1 | Chr17 | exotic     | Down | -11.4094 | 0.0103 | -20.9222 | 0.0138 |

---
