# Supplementary figures and images for: Lnc-TMEM132D-AS1 as a potential therapeutic target for acquired resistance to osimertinib in non-small-cell lung cancer
Source: Royal Society of Chemistry journal article supplement (doi:10.1039/d2mo00261b), 2022-12-21

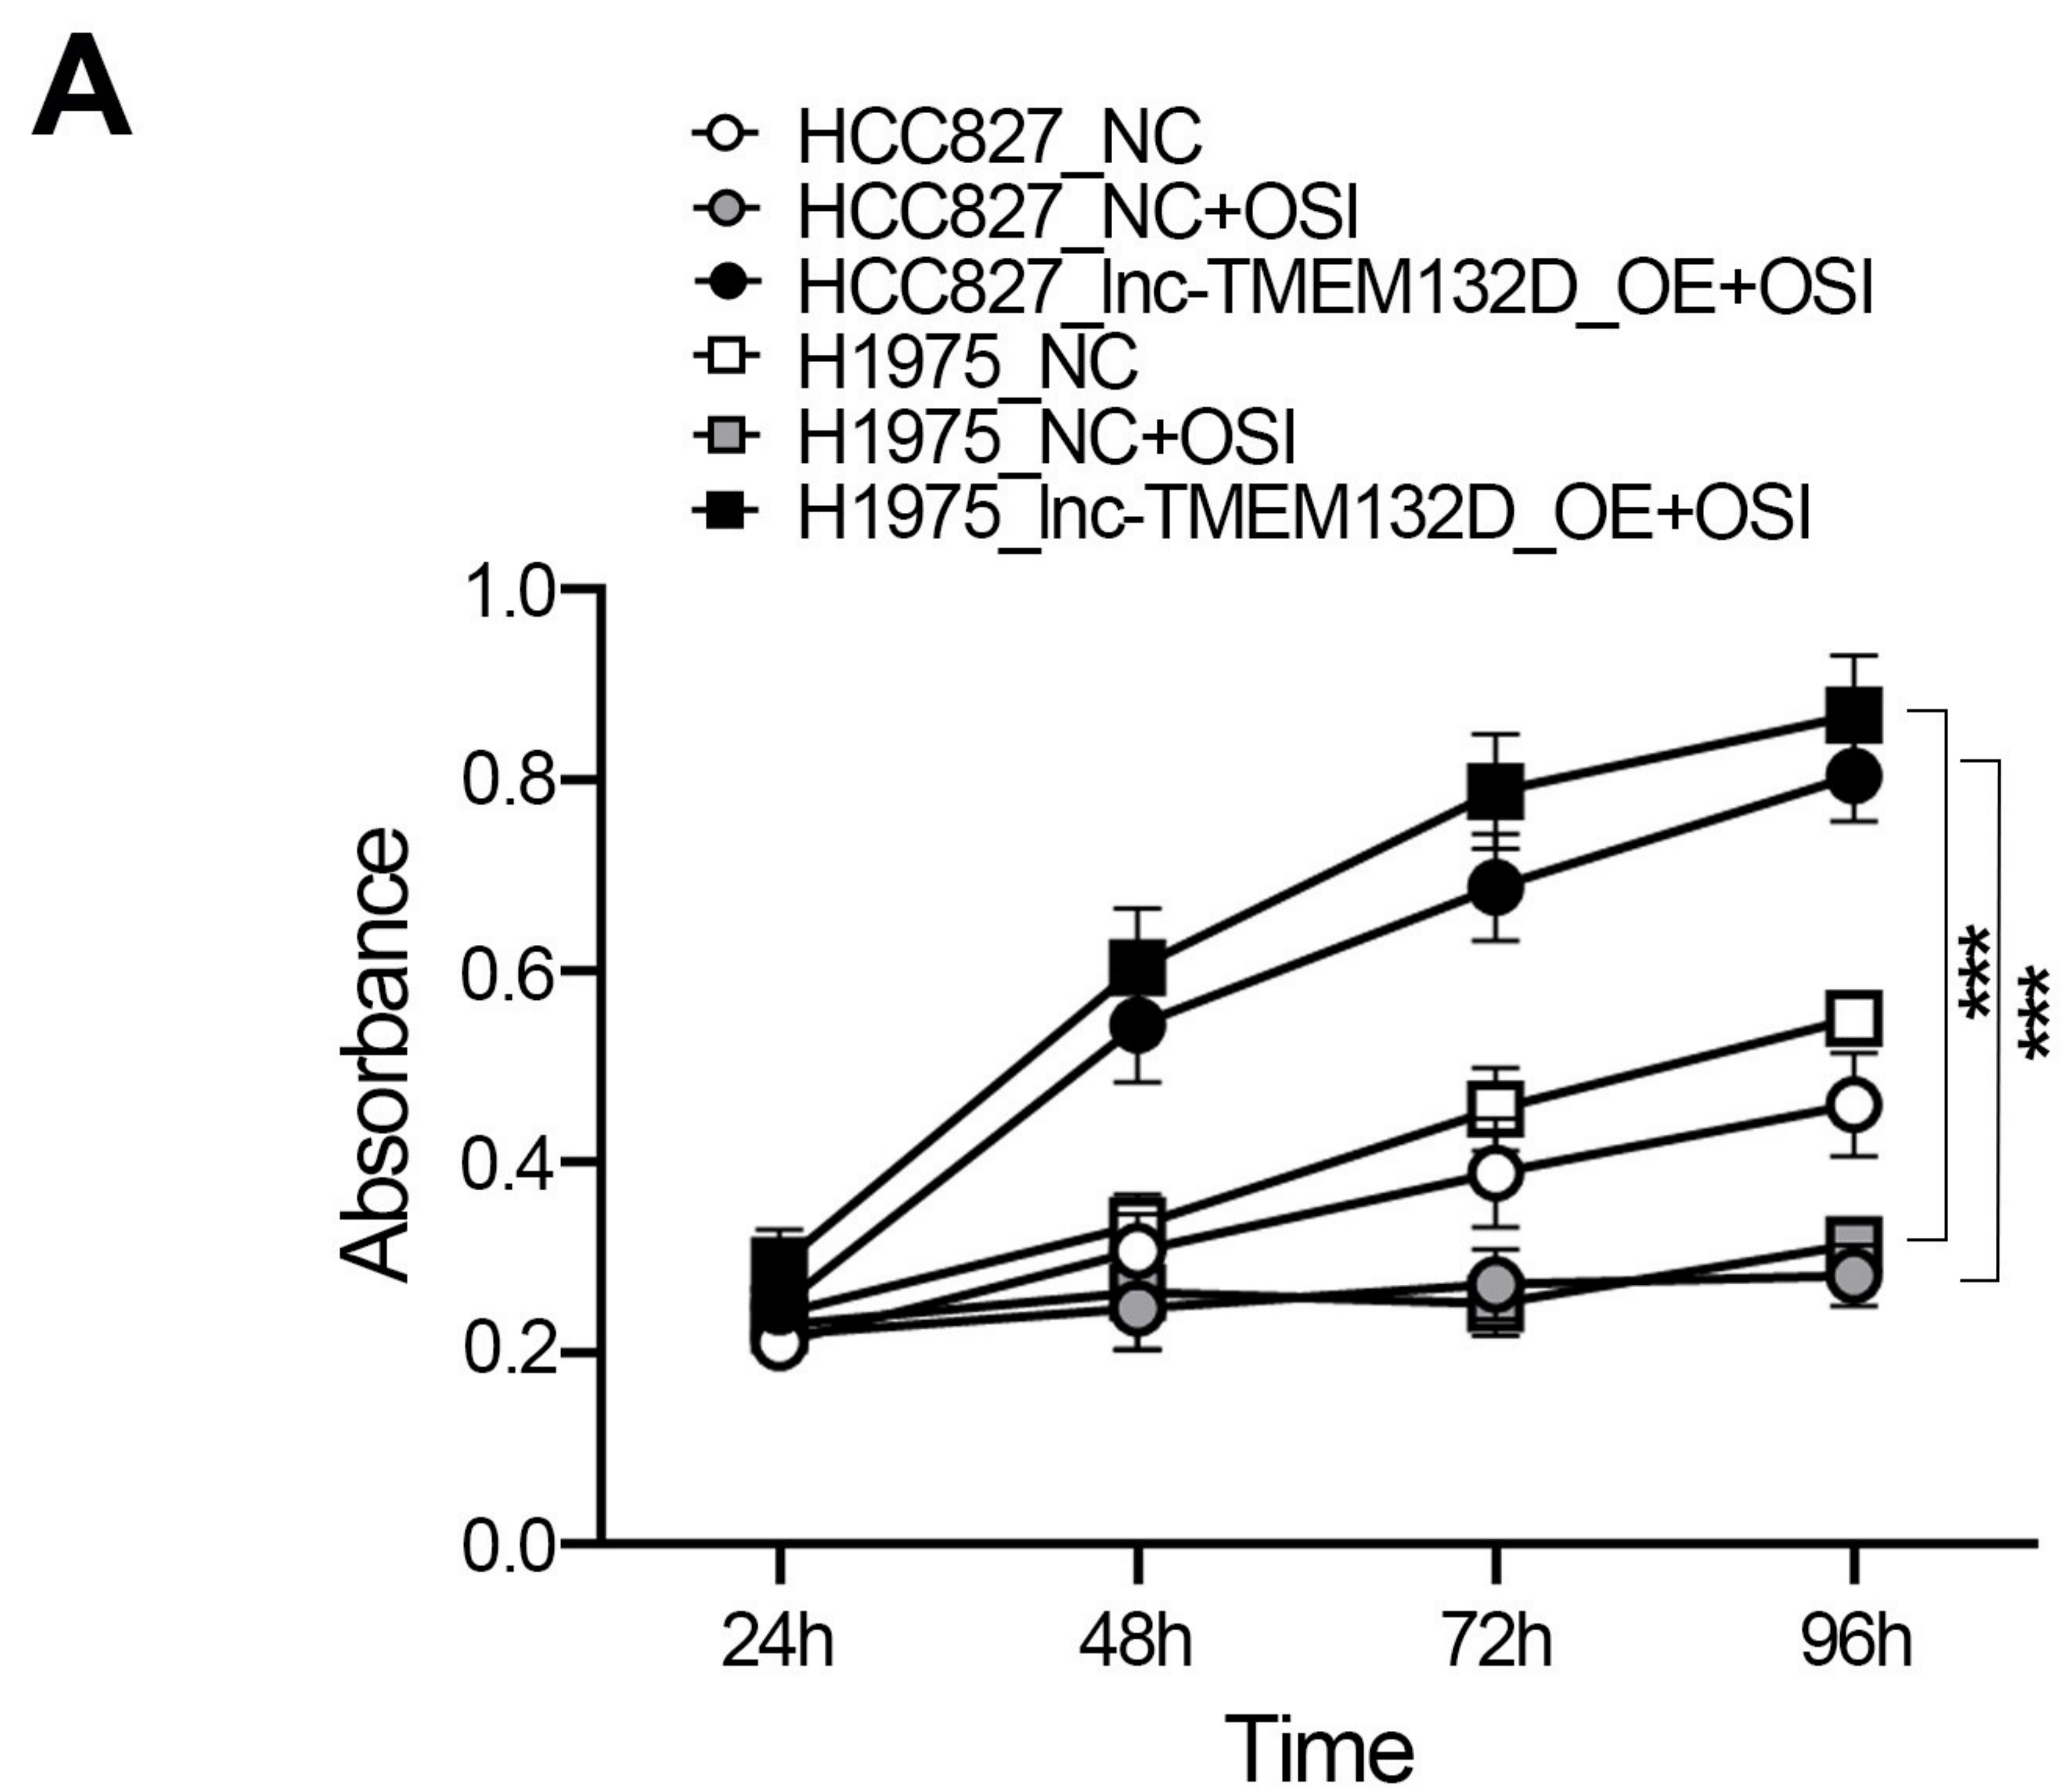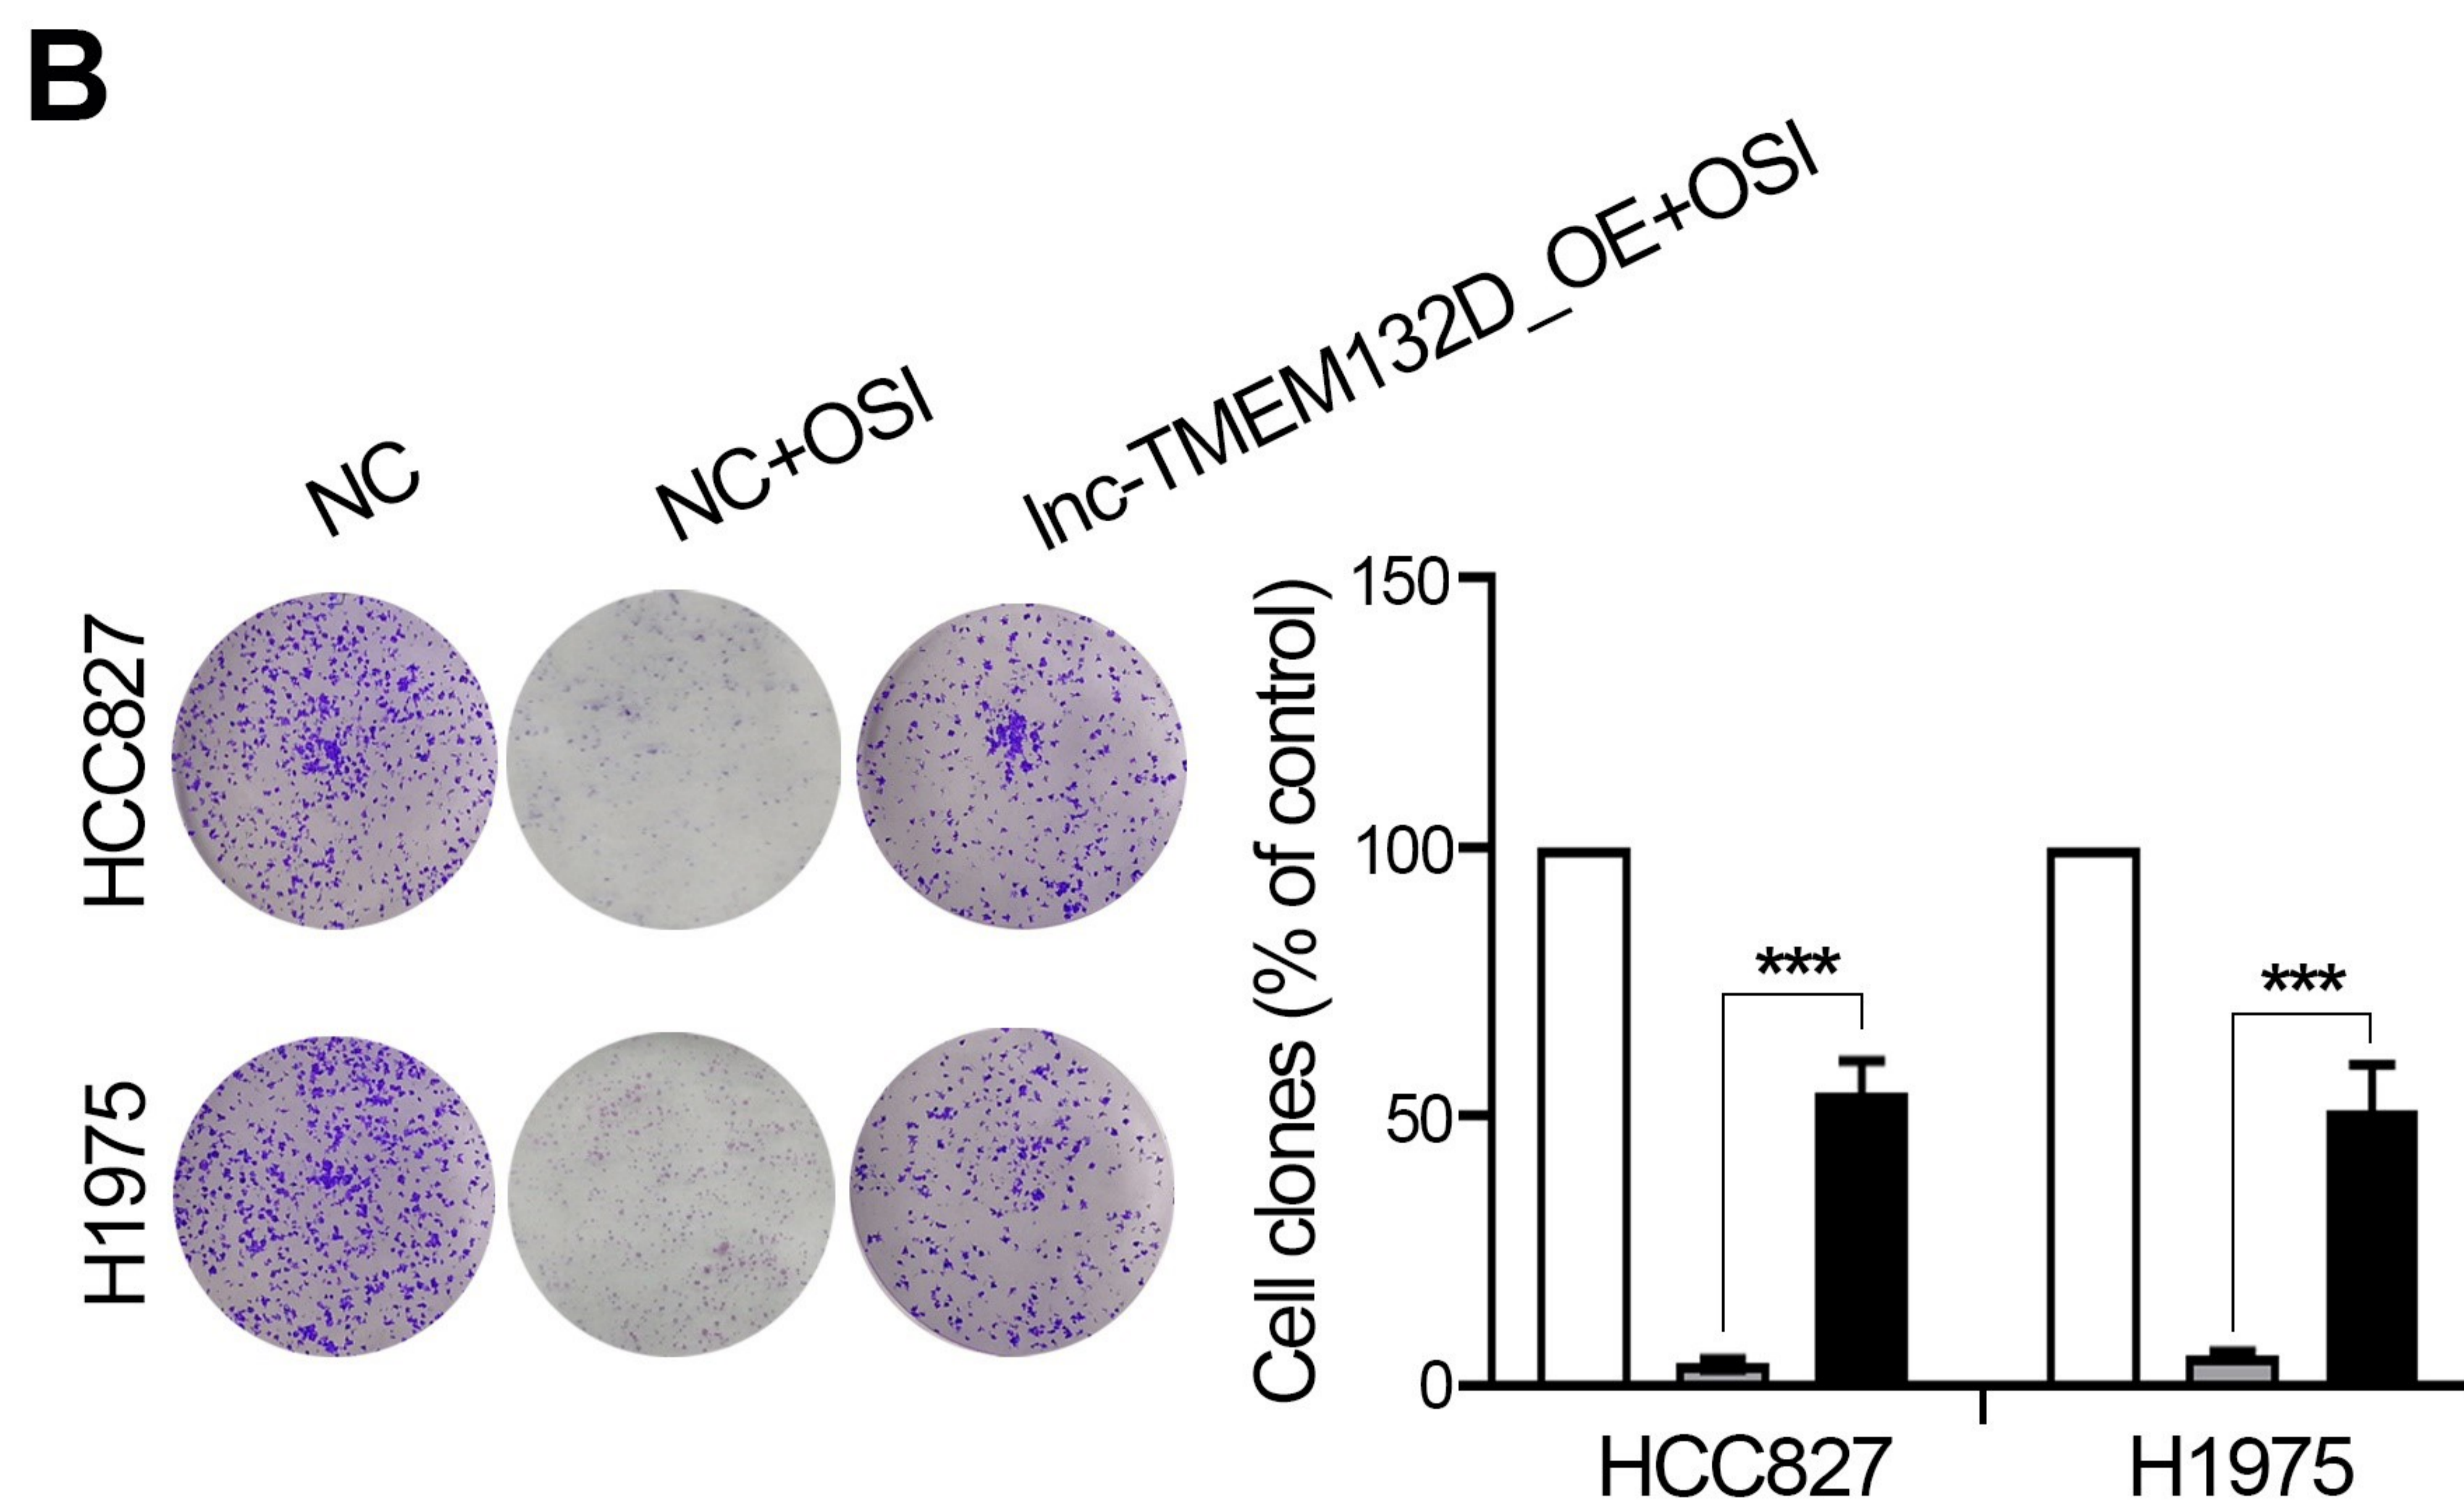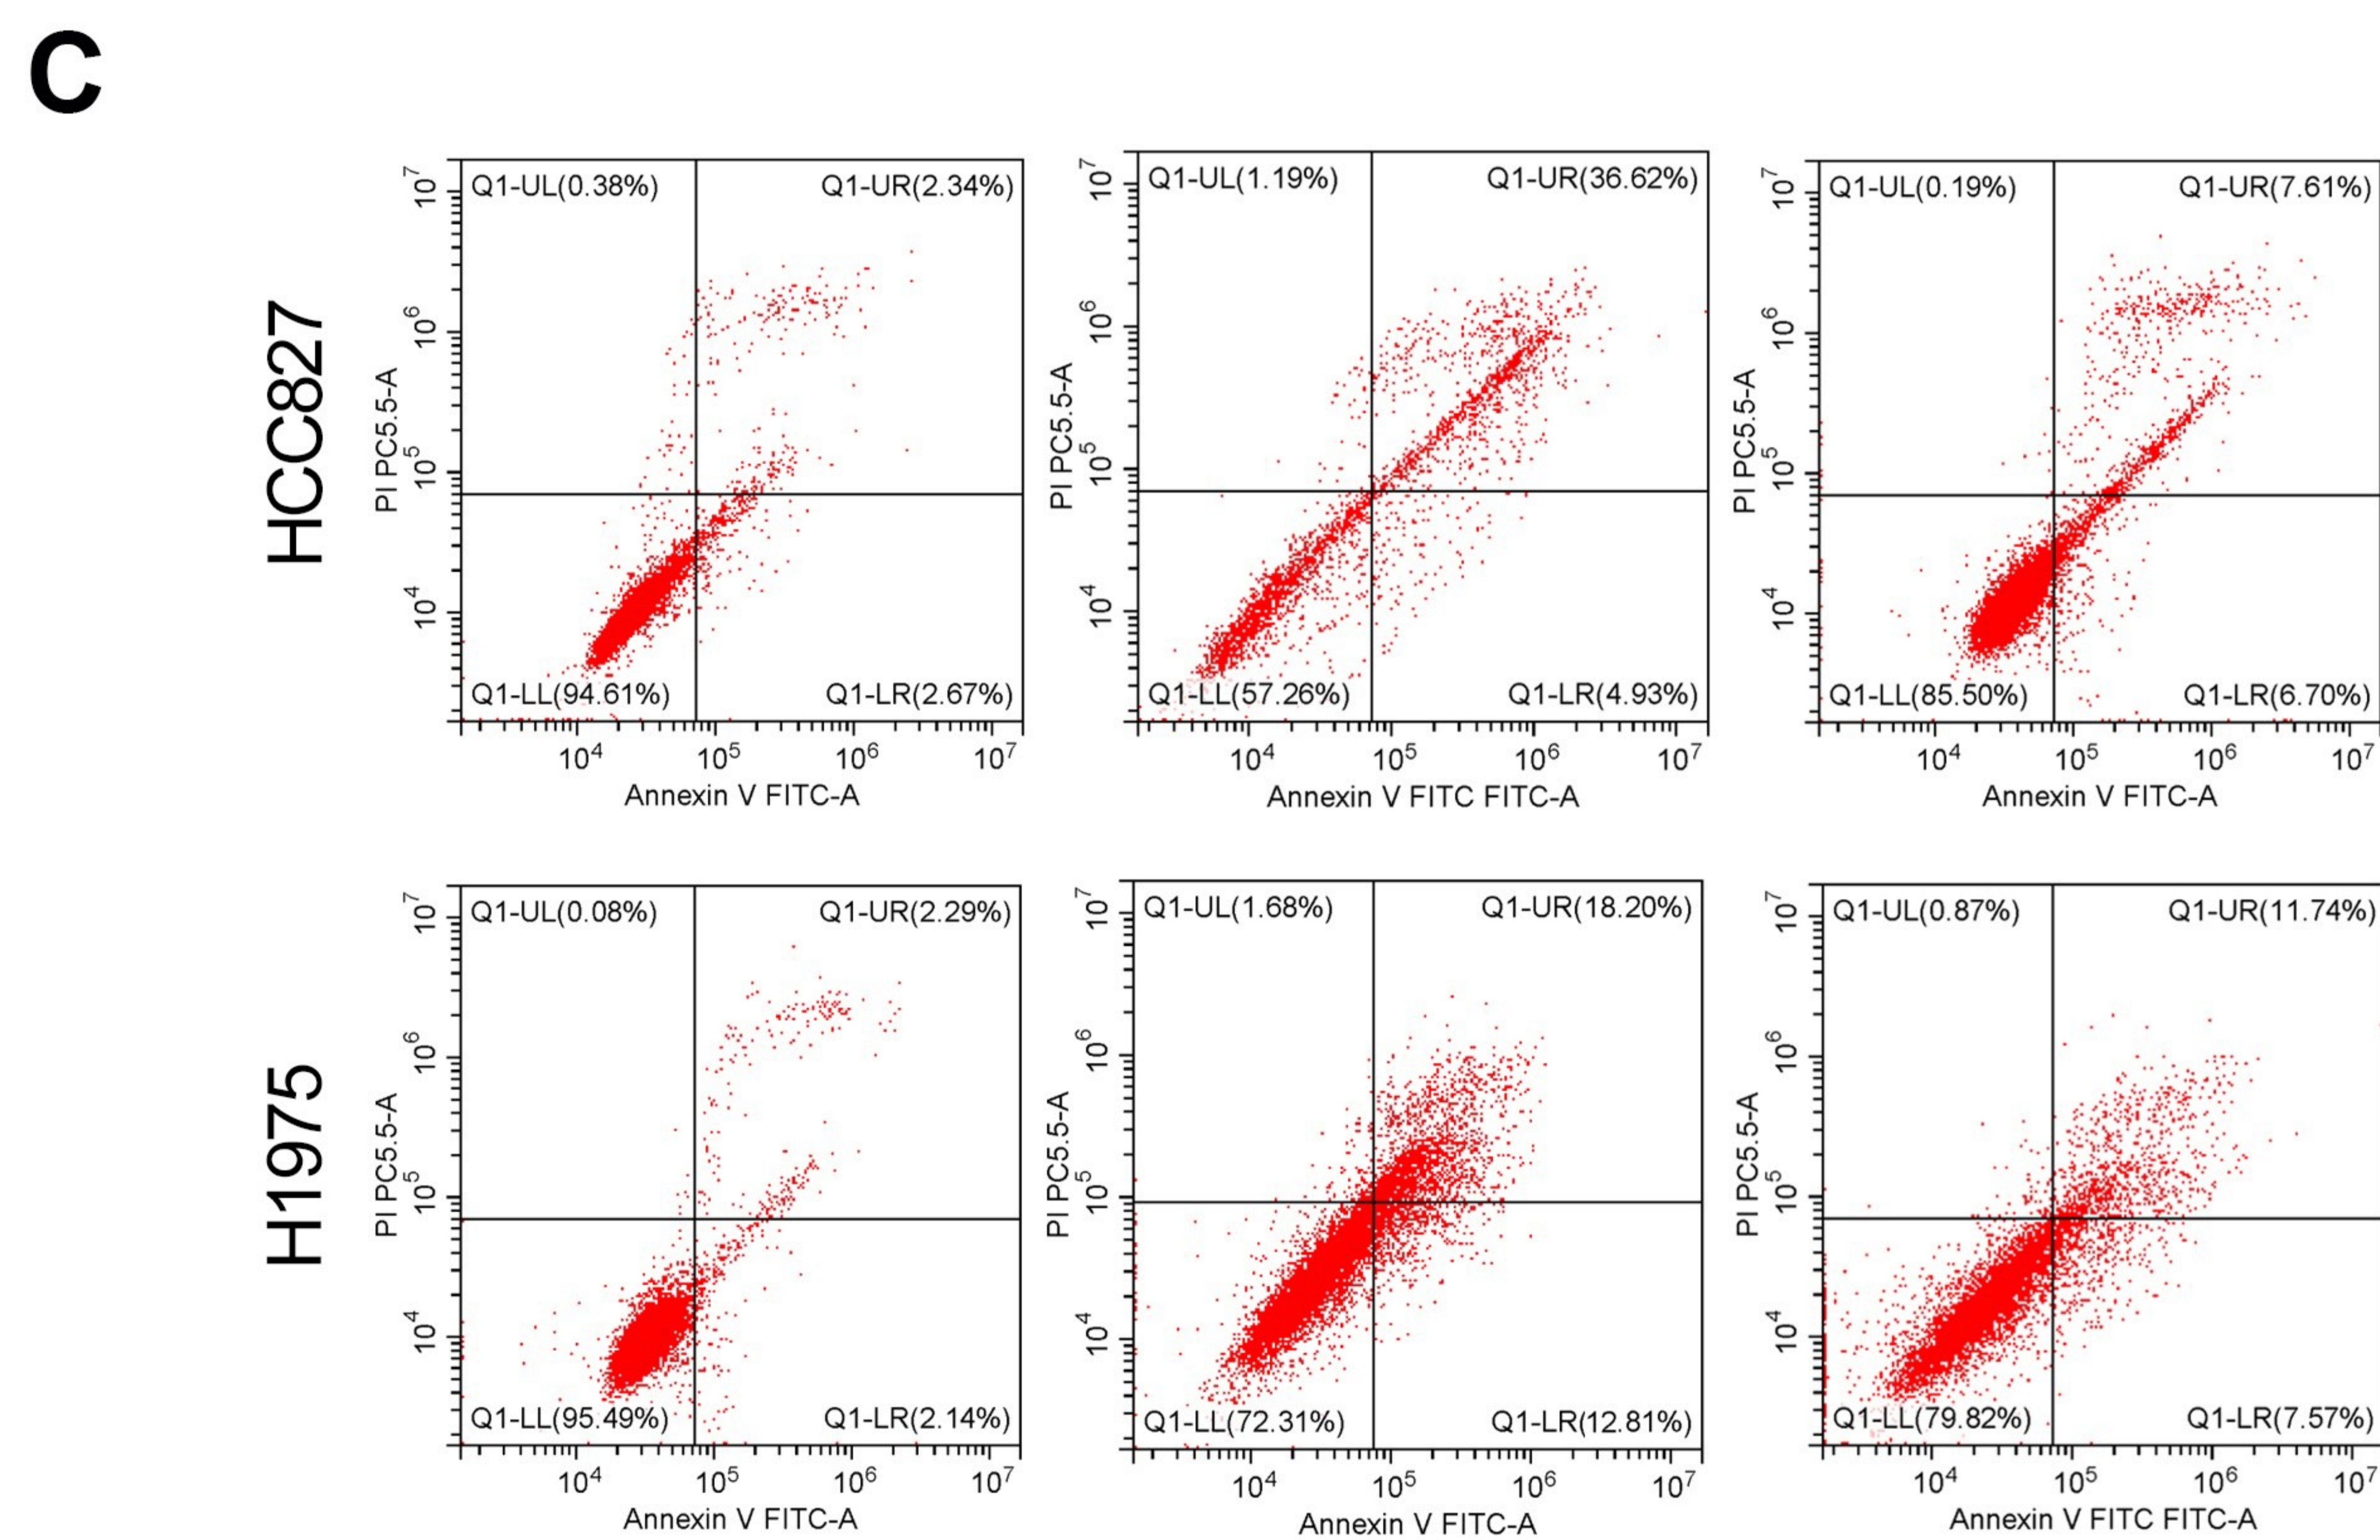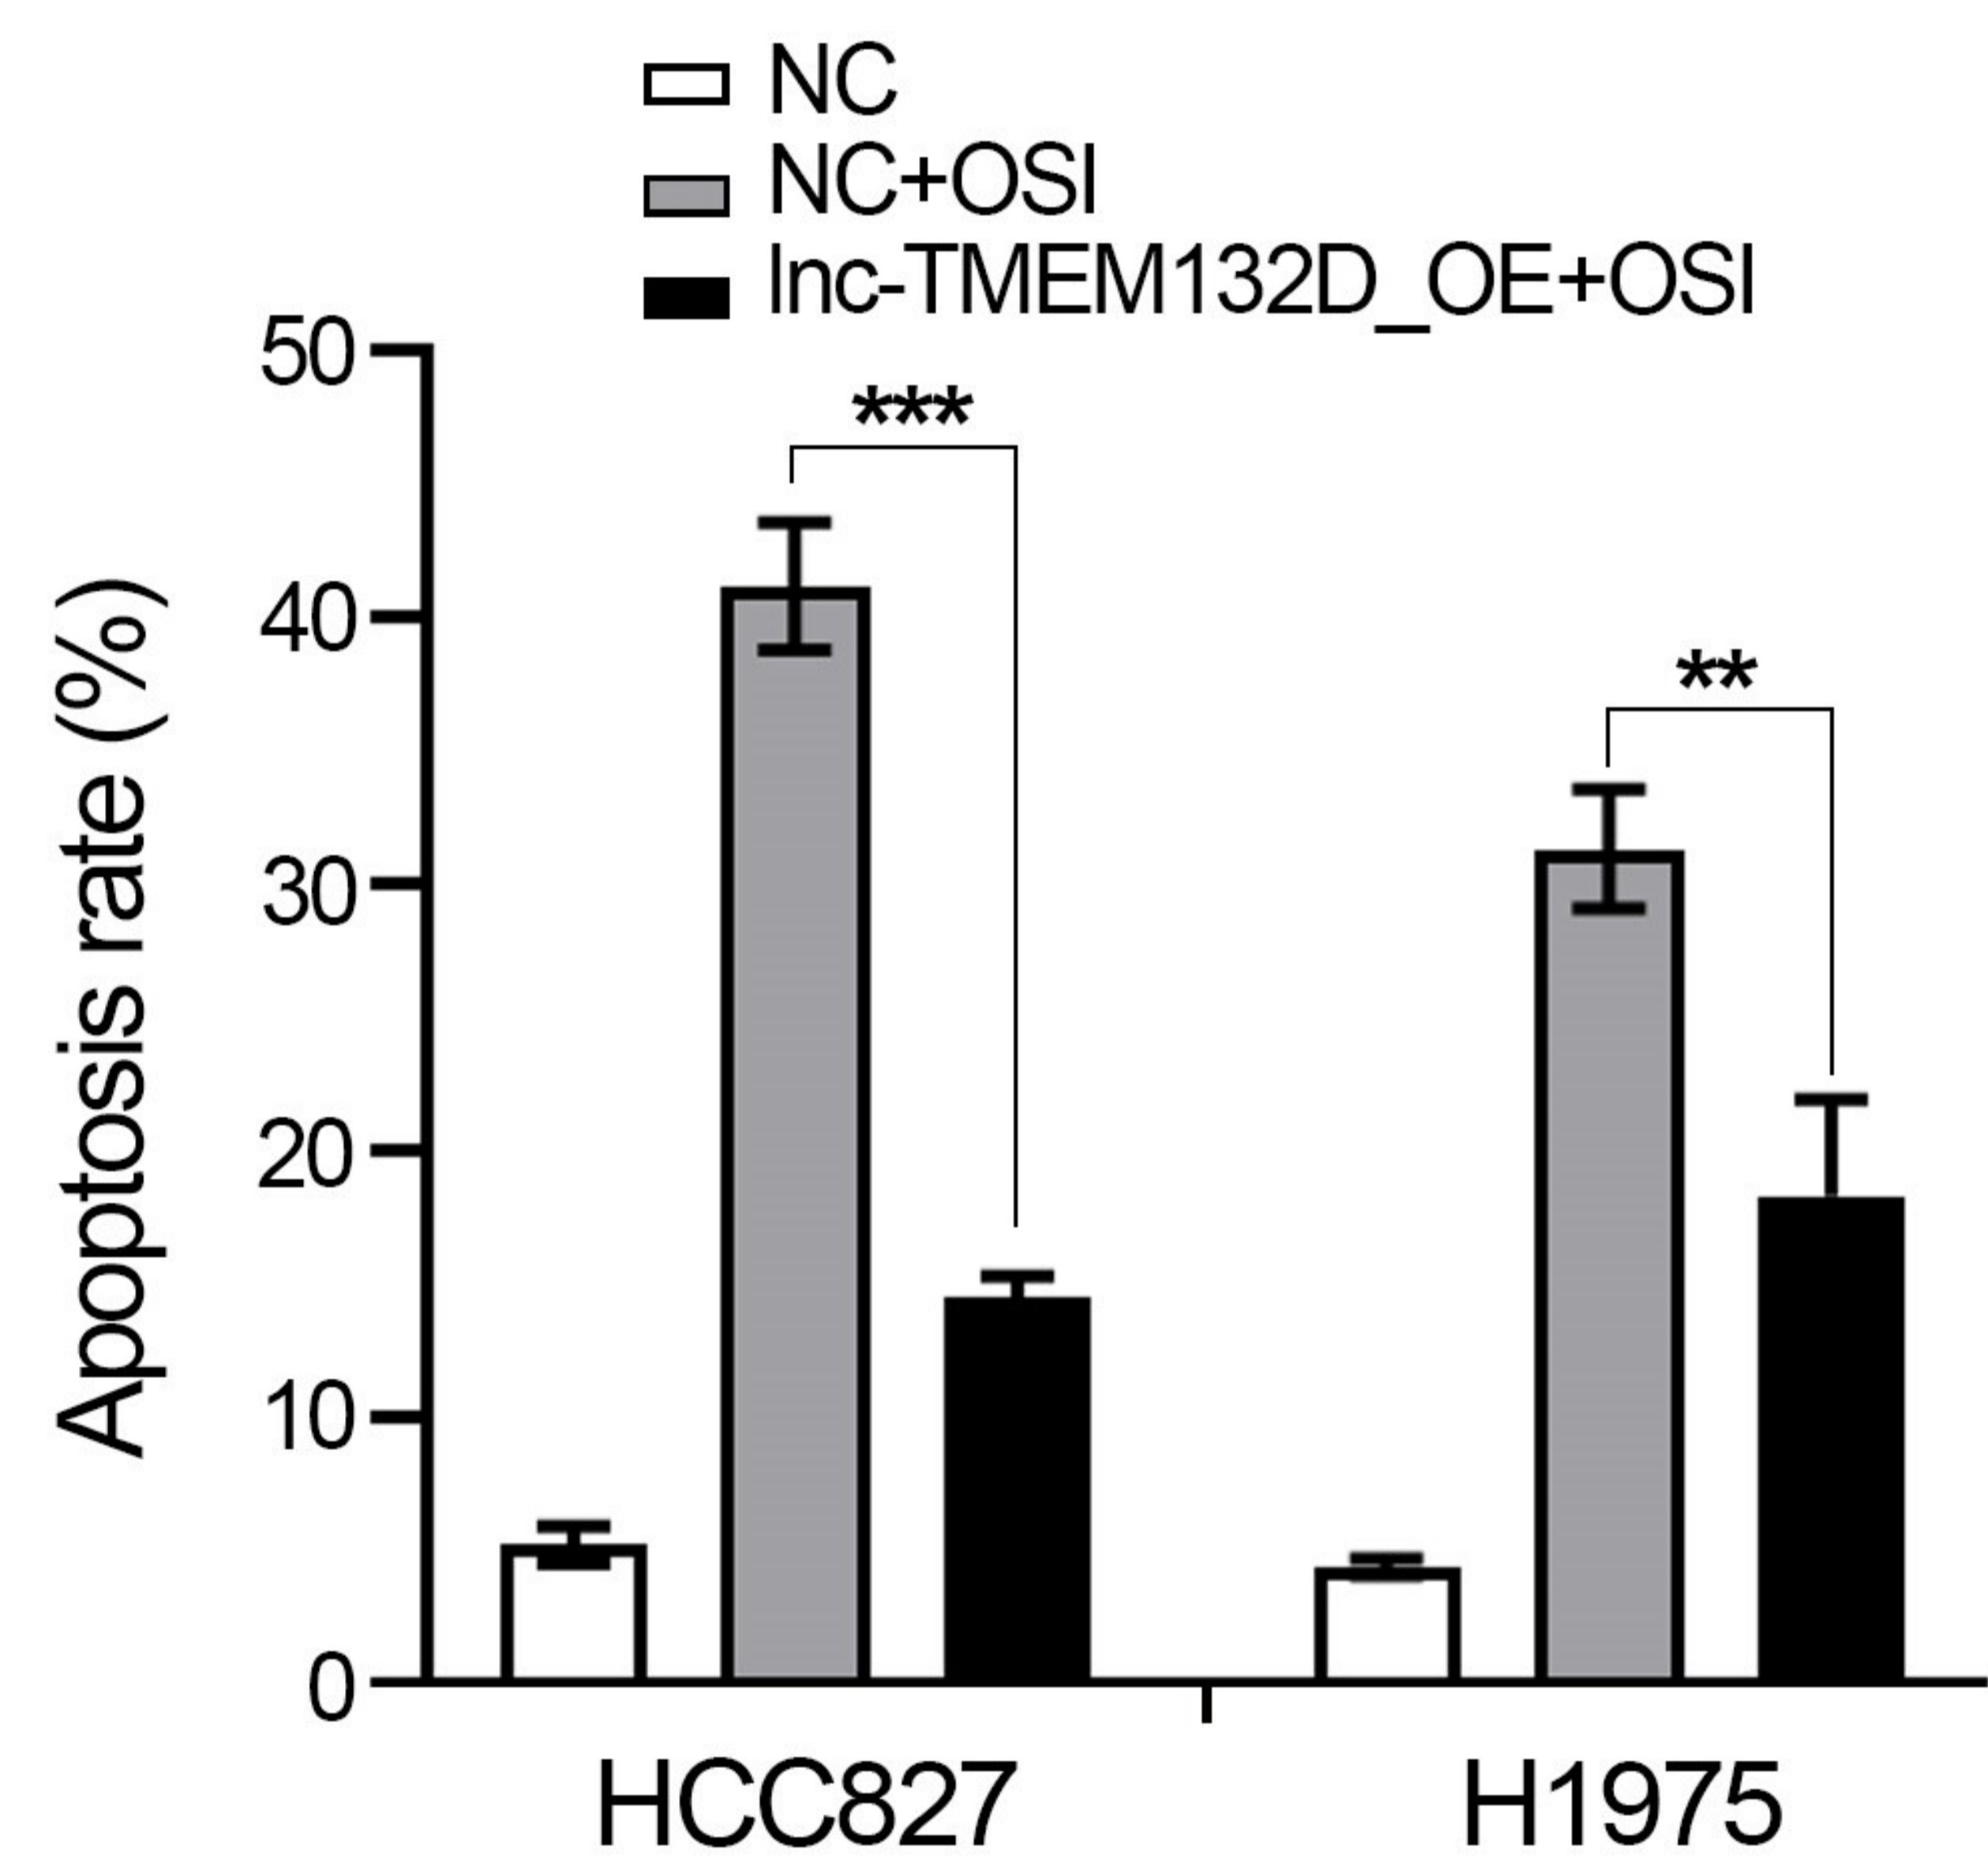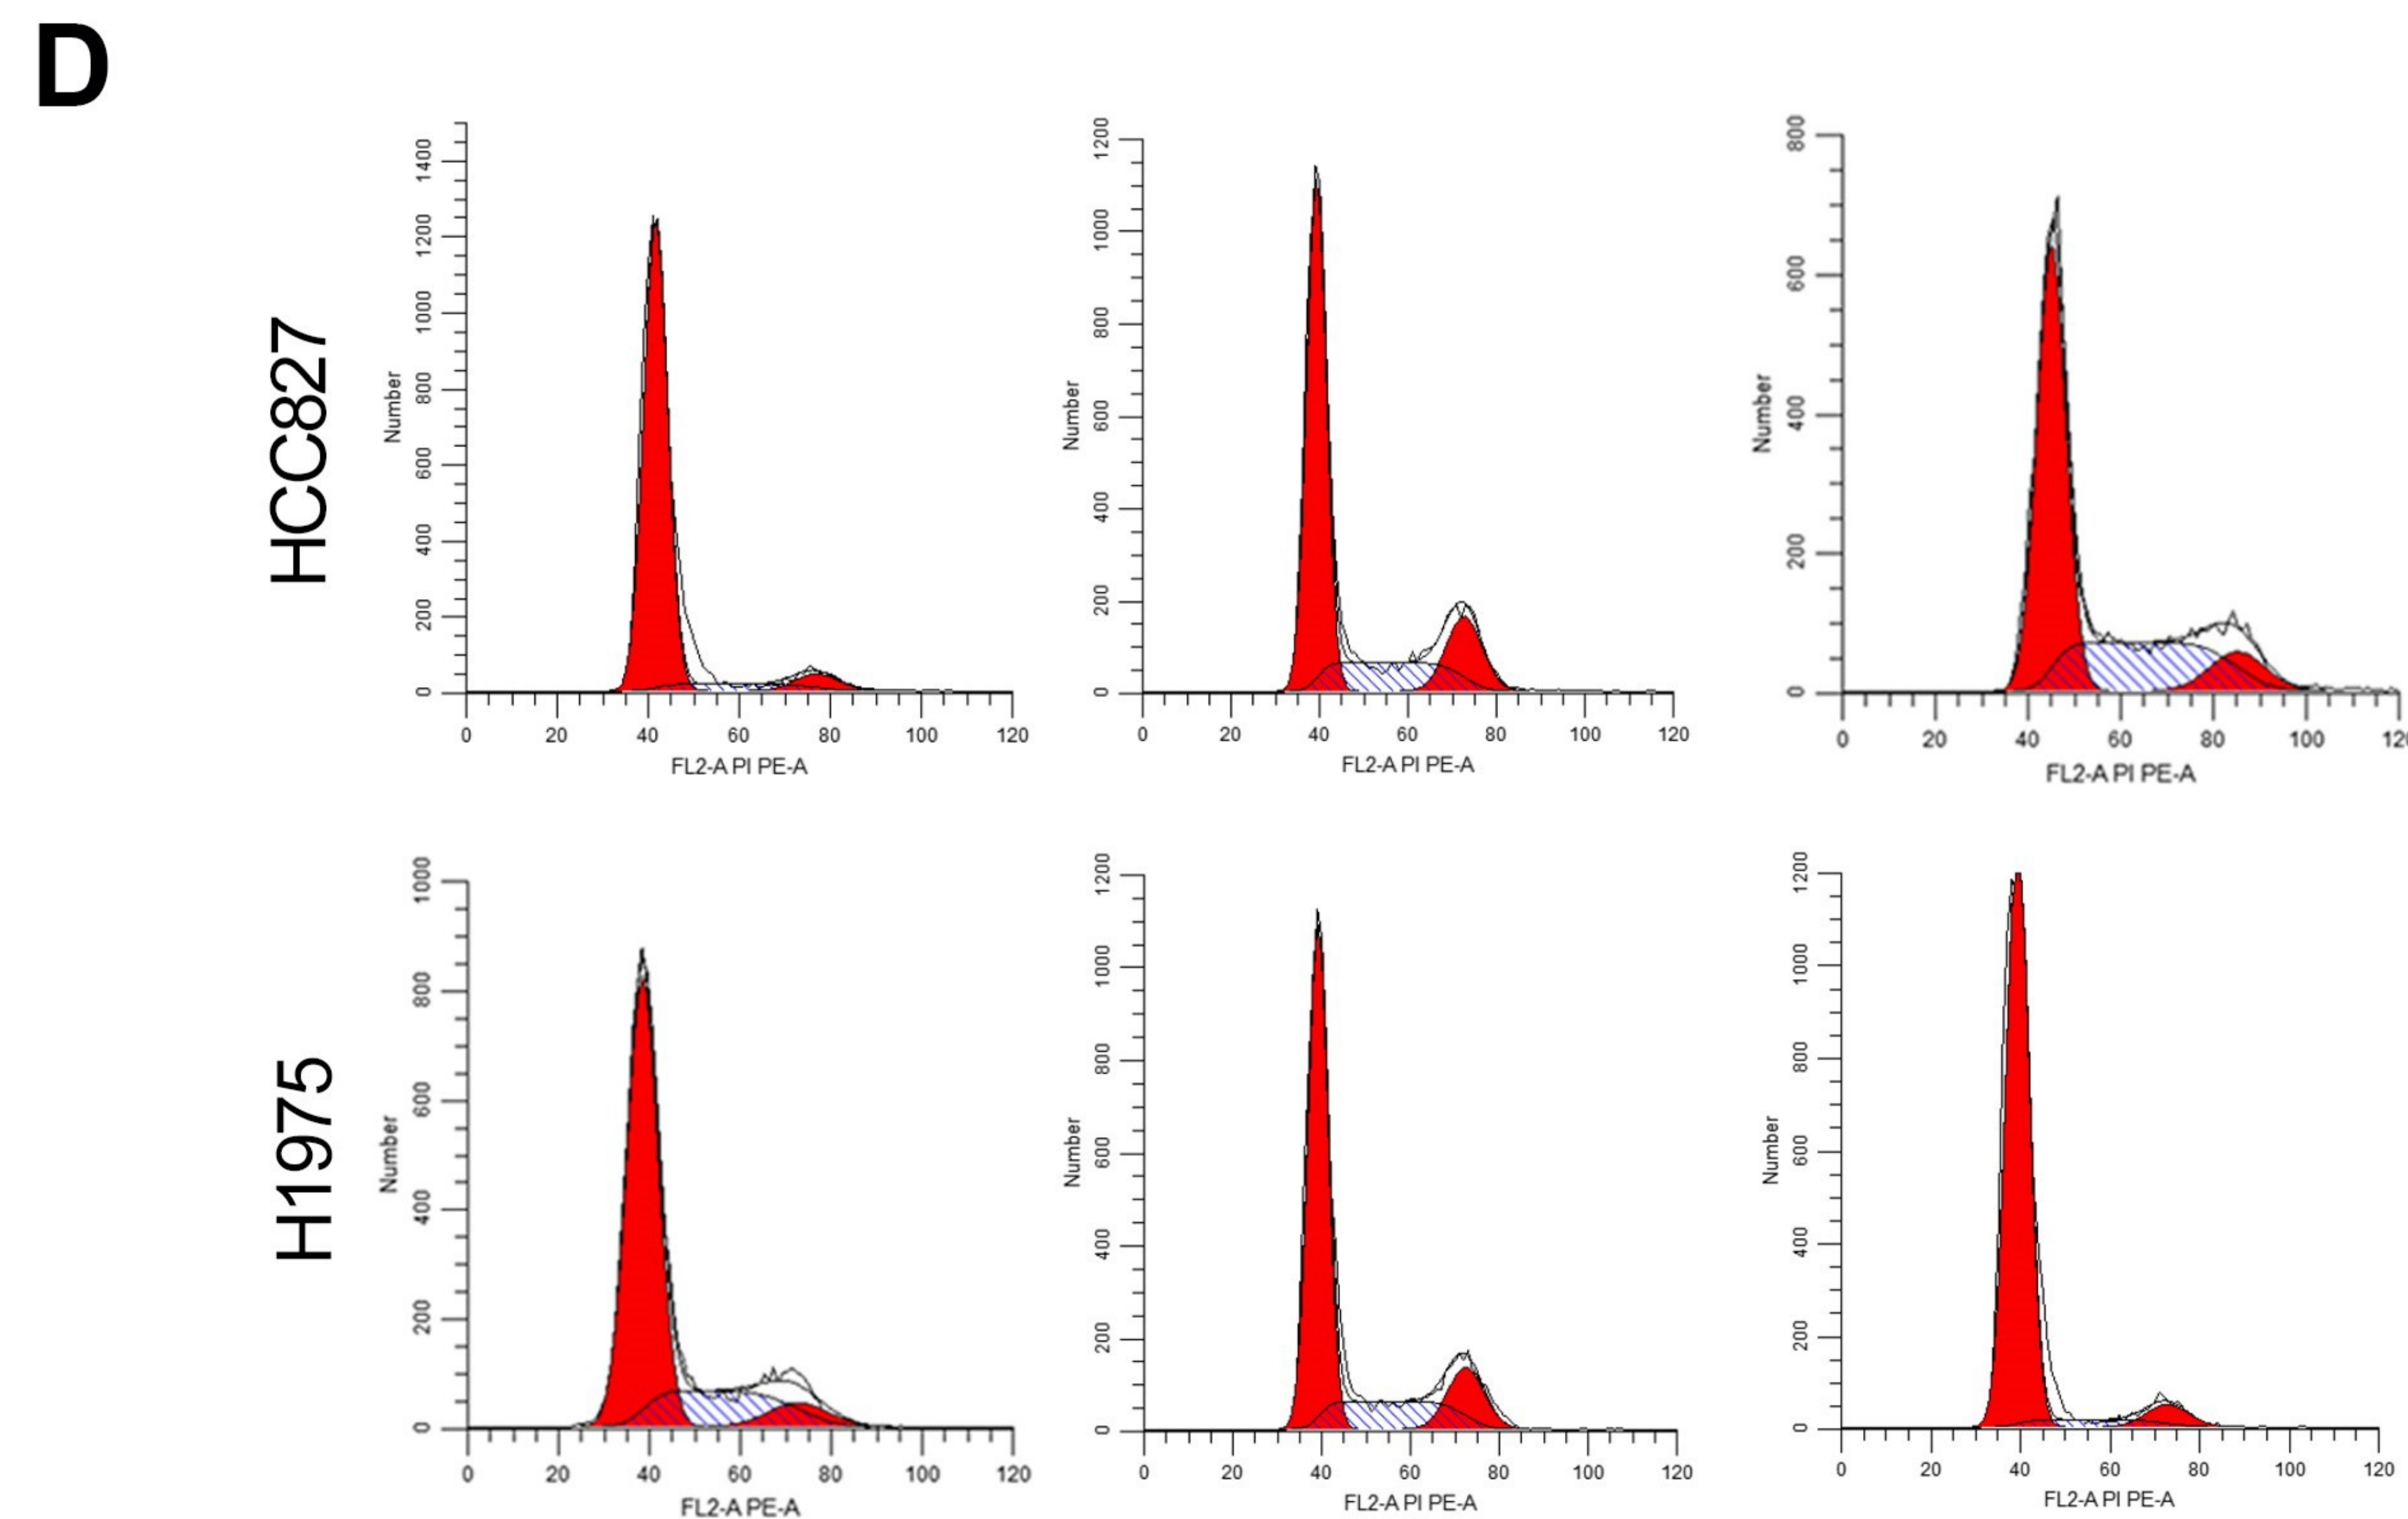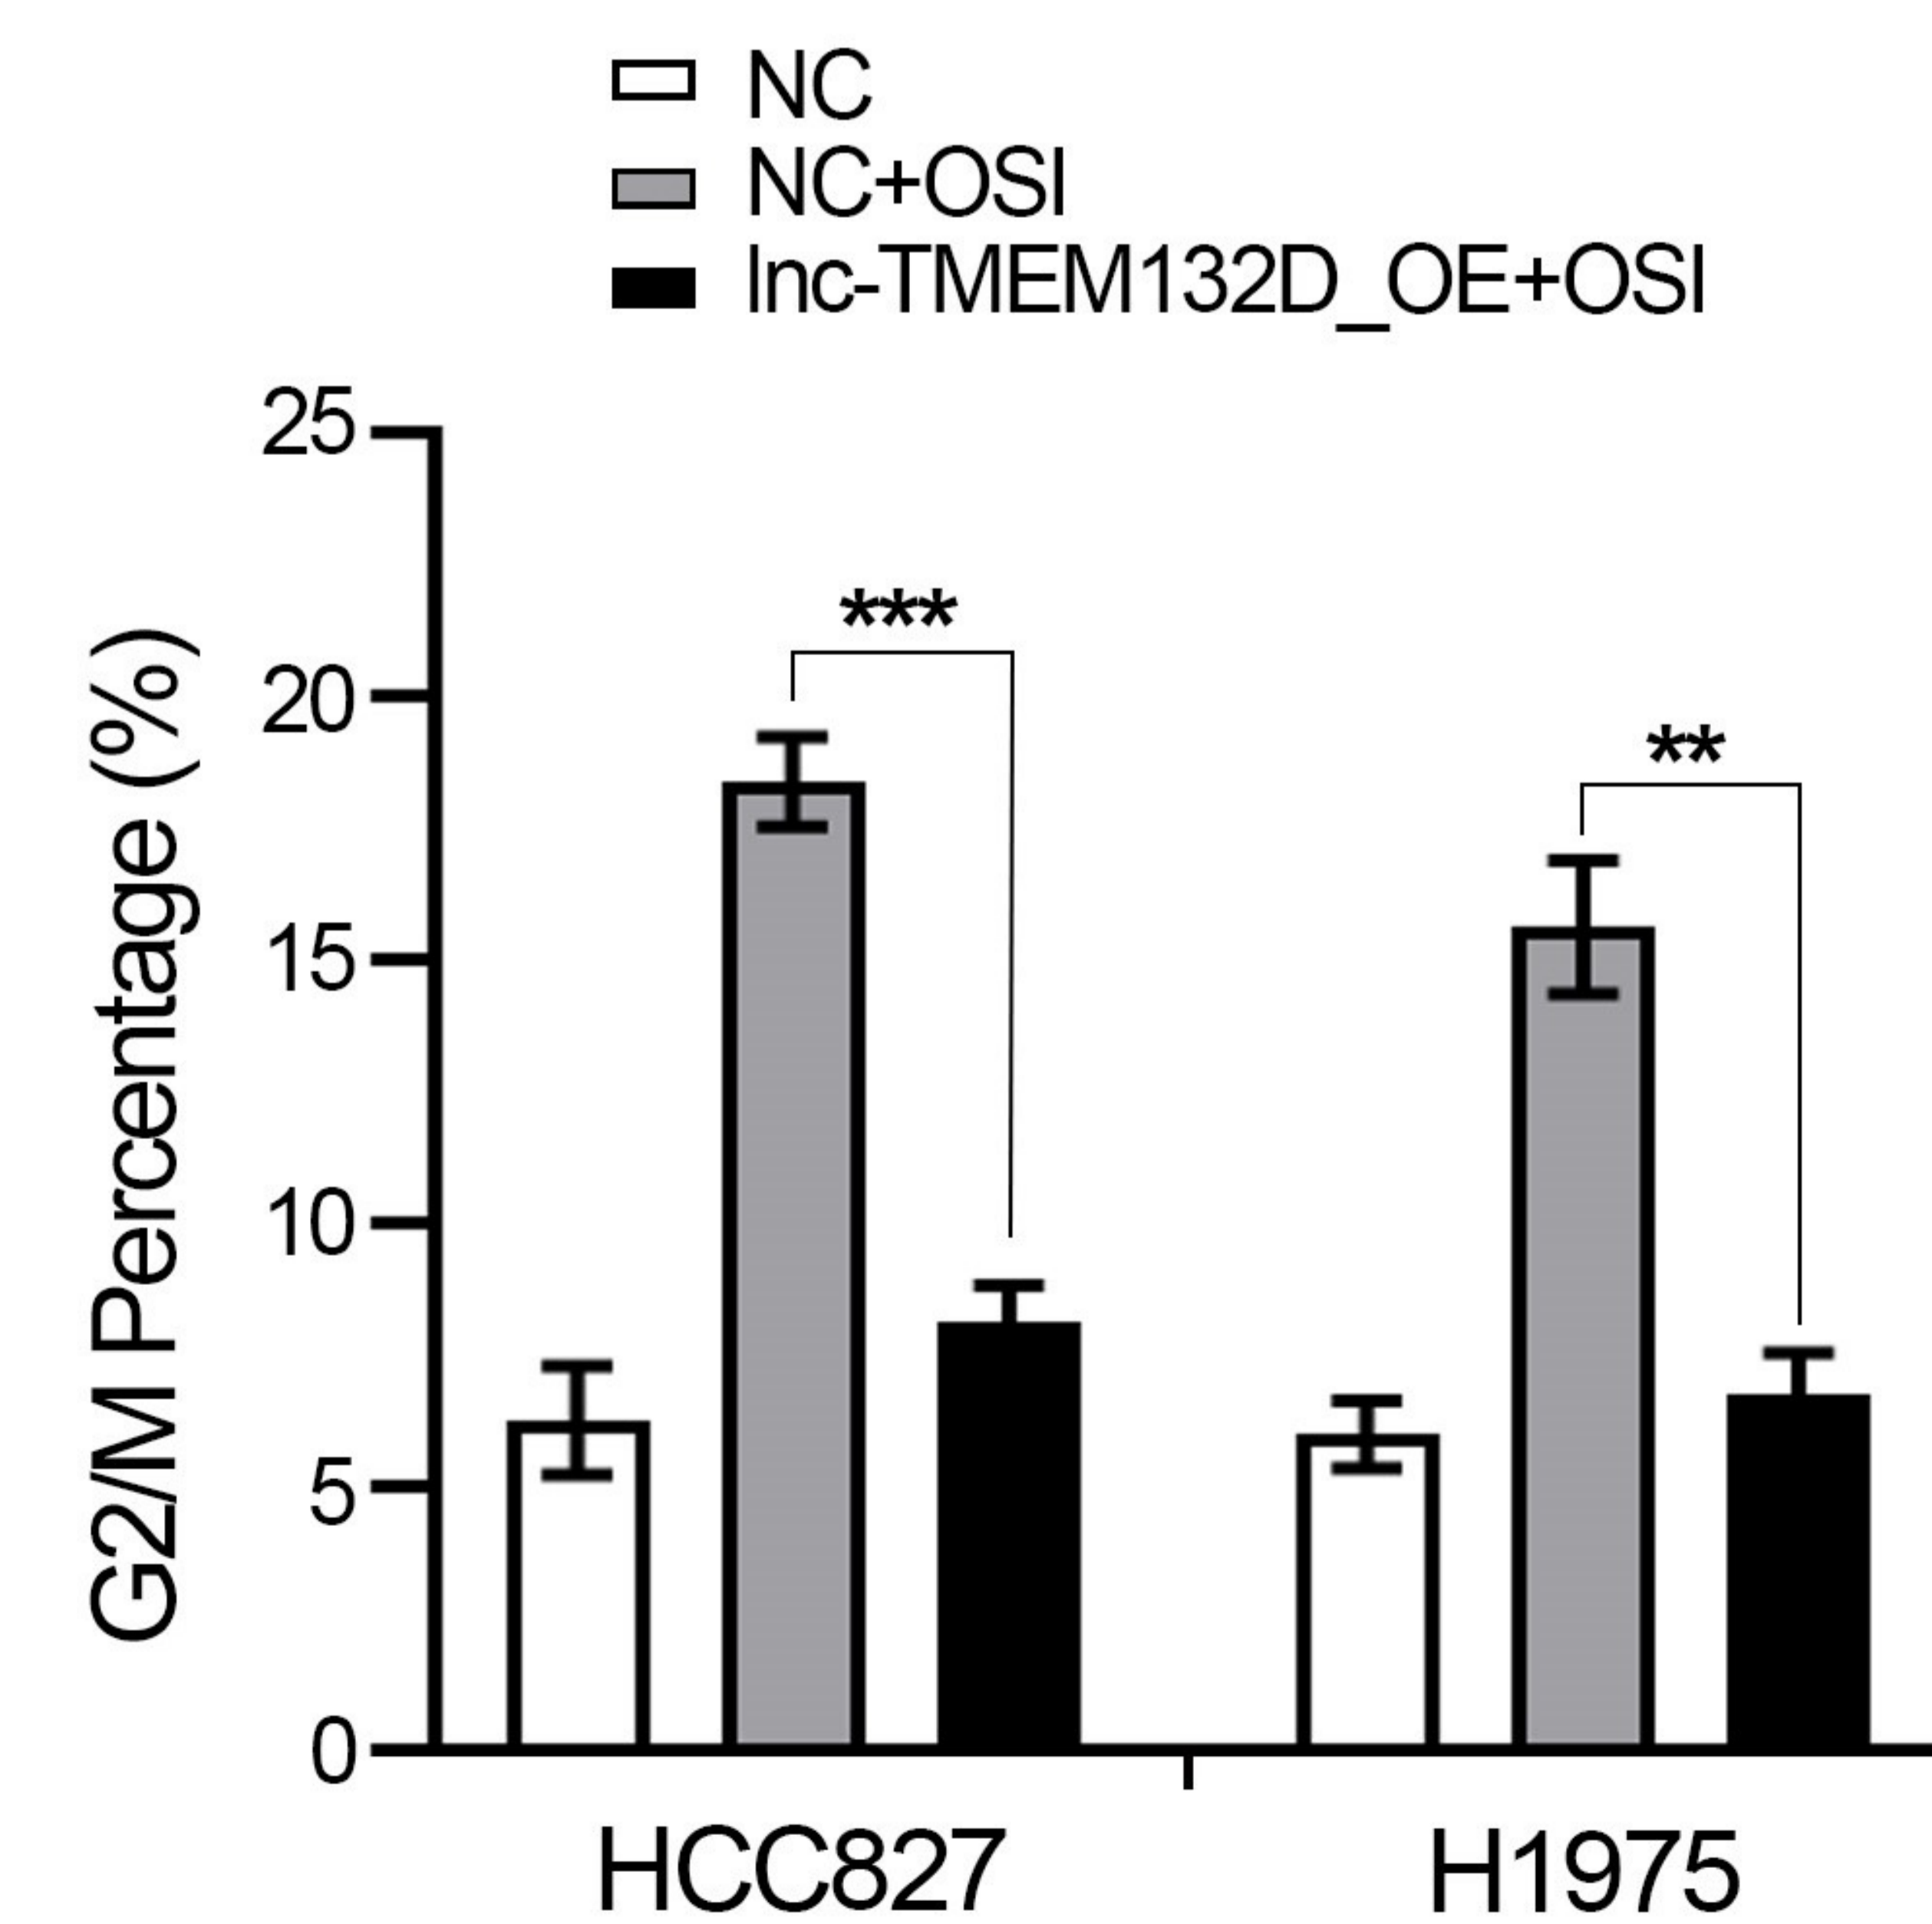

Supplement: d2mo00261b1.pdf [file d2mo00261b1.pdf]

### EGFR

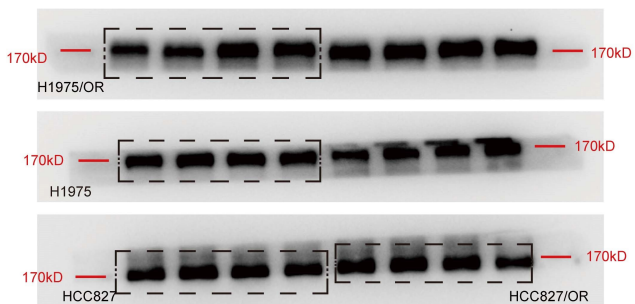

### p-EGFR

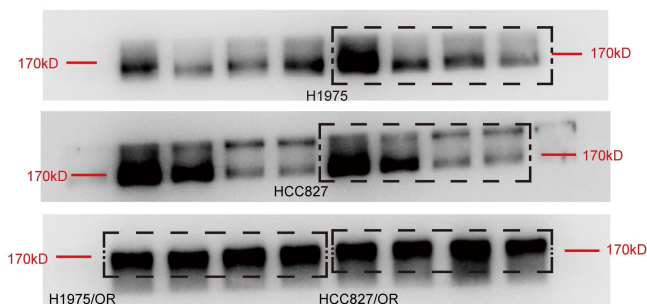

### PI3K

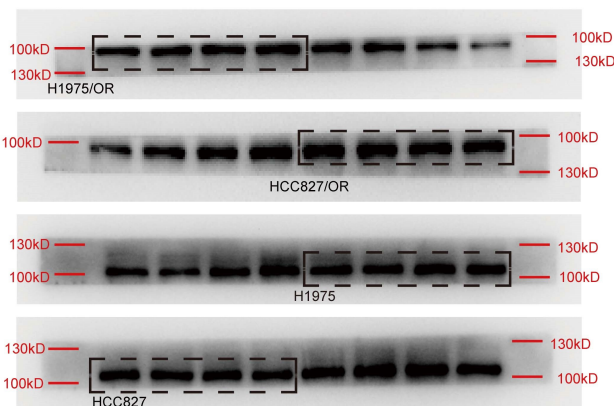

### p-PI3K

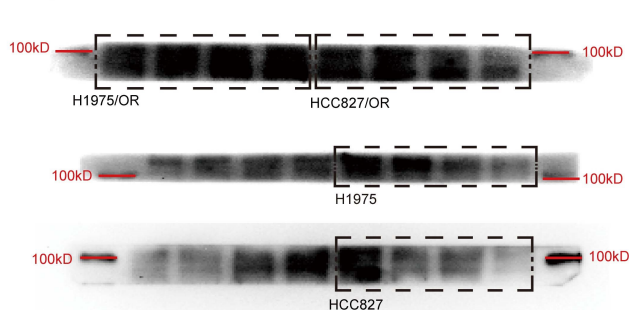

### AKT

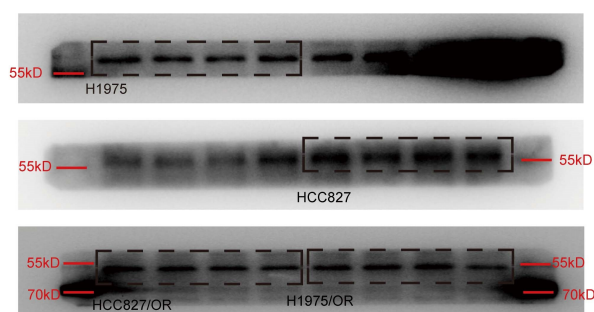

### p-AKT

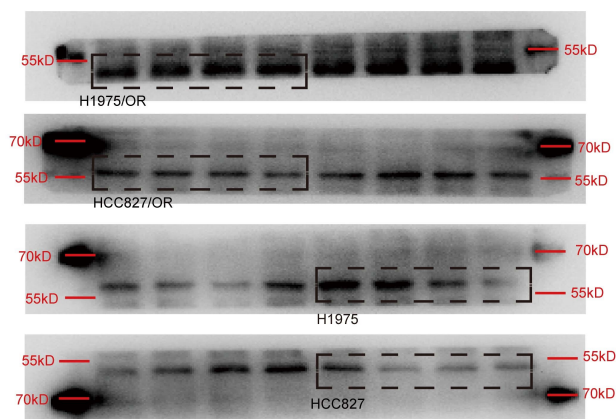

### GAPDH

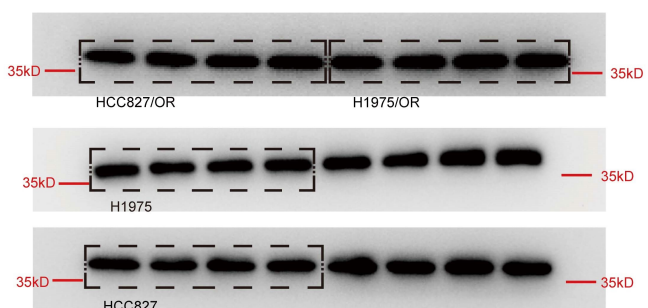

Supplement: d2mo00261b2.pdf [file d2mo00261b2.pdf]

## Figure 5A

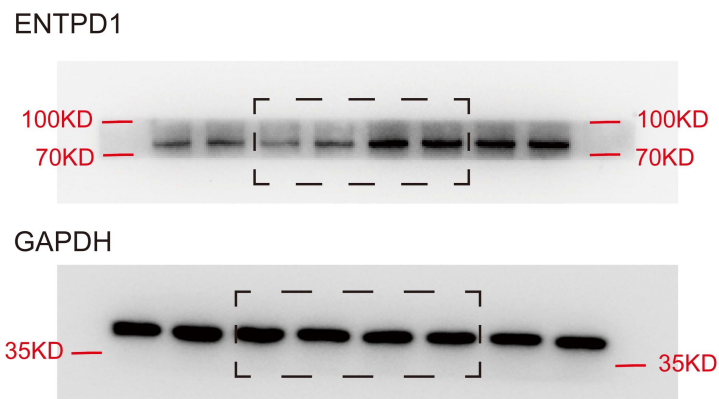

## Figure 5G

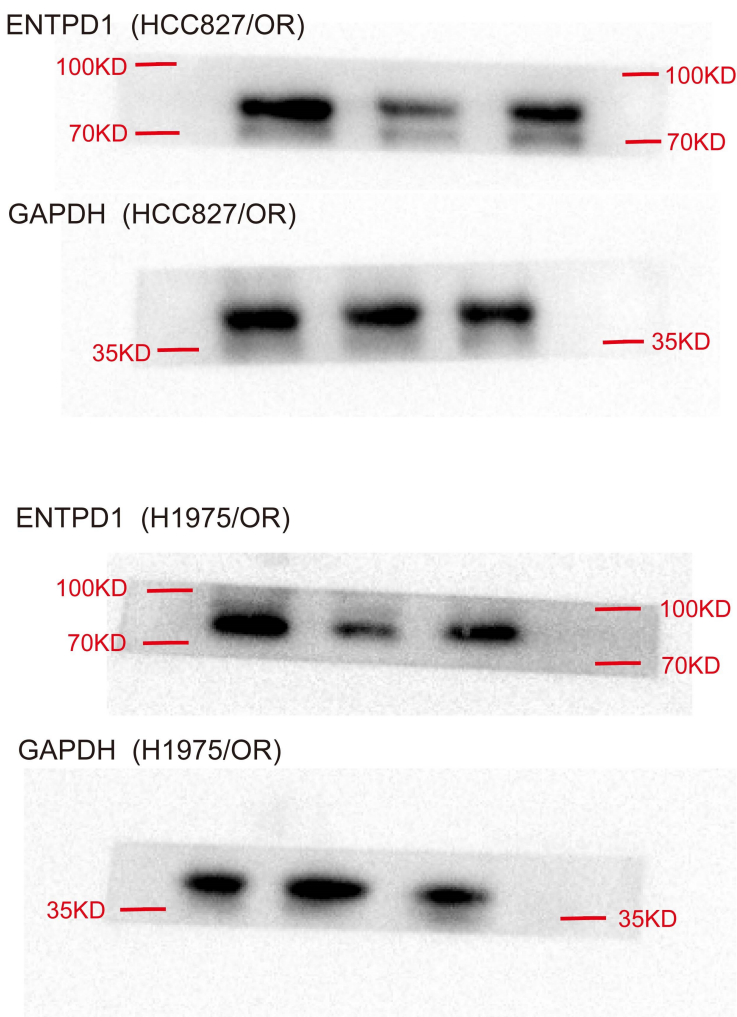

Supplement: d2mo00261b3.pdf [file d2mo00261b3.pdf]
